# Supplementary material
Source: PubMed Central journal article supplement (PMC6066758)
Supplement: se8b00340_si_001.pdf [file se8b00340_si_001.pdf]

# Supporting Information

Paper title: Hacking CD/DVD/Blu-ray for Biosensing

Author: Edwin En-Te Hwu\*, Anja Boisen

Affiliation: Center for Intelligent Drug Delivery and Sensing Using Microcontainers and Nanomechanics (IDUN), Department of Micro- and Nanotechnology, Technical University of Denmark, Lyngby 2800, Denmark

Page 2:

Figure S-1. Customized controller circuit design for KEM 410 (Play Station 3; Sony Co., Tokyo, Japan) triple-wavelength OPU with dual objective lens.

Page 3:

Figure S-2. Customized controller circuit design for PHR-803T (Toshiba Co., Tokyo, Japan) with triple-wavelength OPU inside the XBOX 360 (Microsoft Co., Redmond, WA, USA).

Page 4:

Figure S-3. Customized controller circuit design for SF-BC620L (Sanyo Electric Co., Ltd., Osaka, Japan) with triple-wavelength OPU.



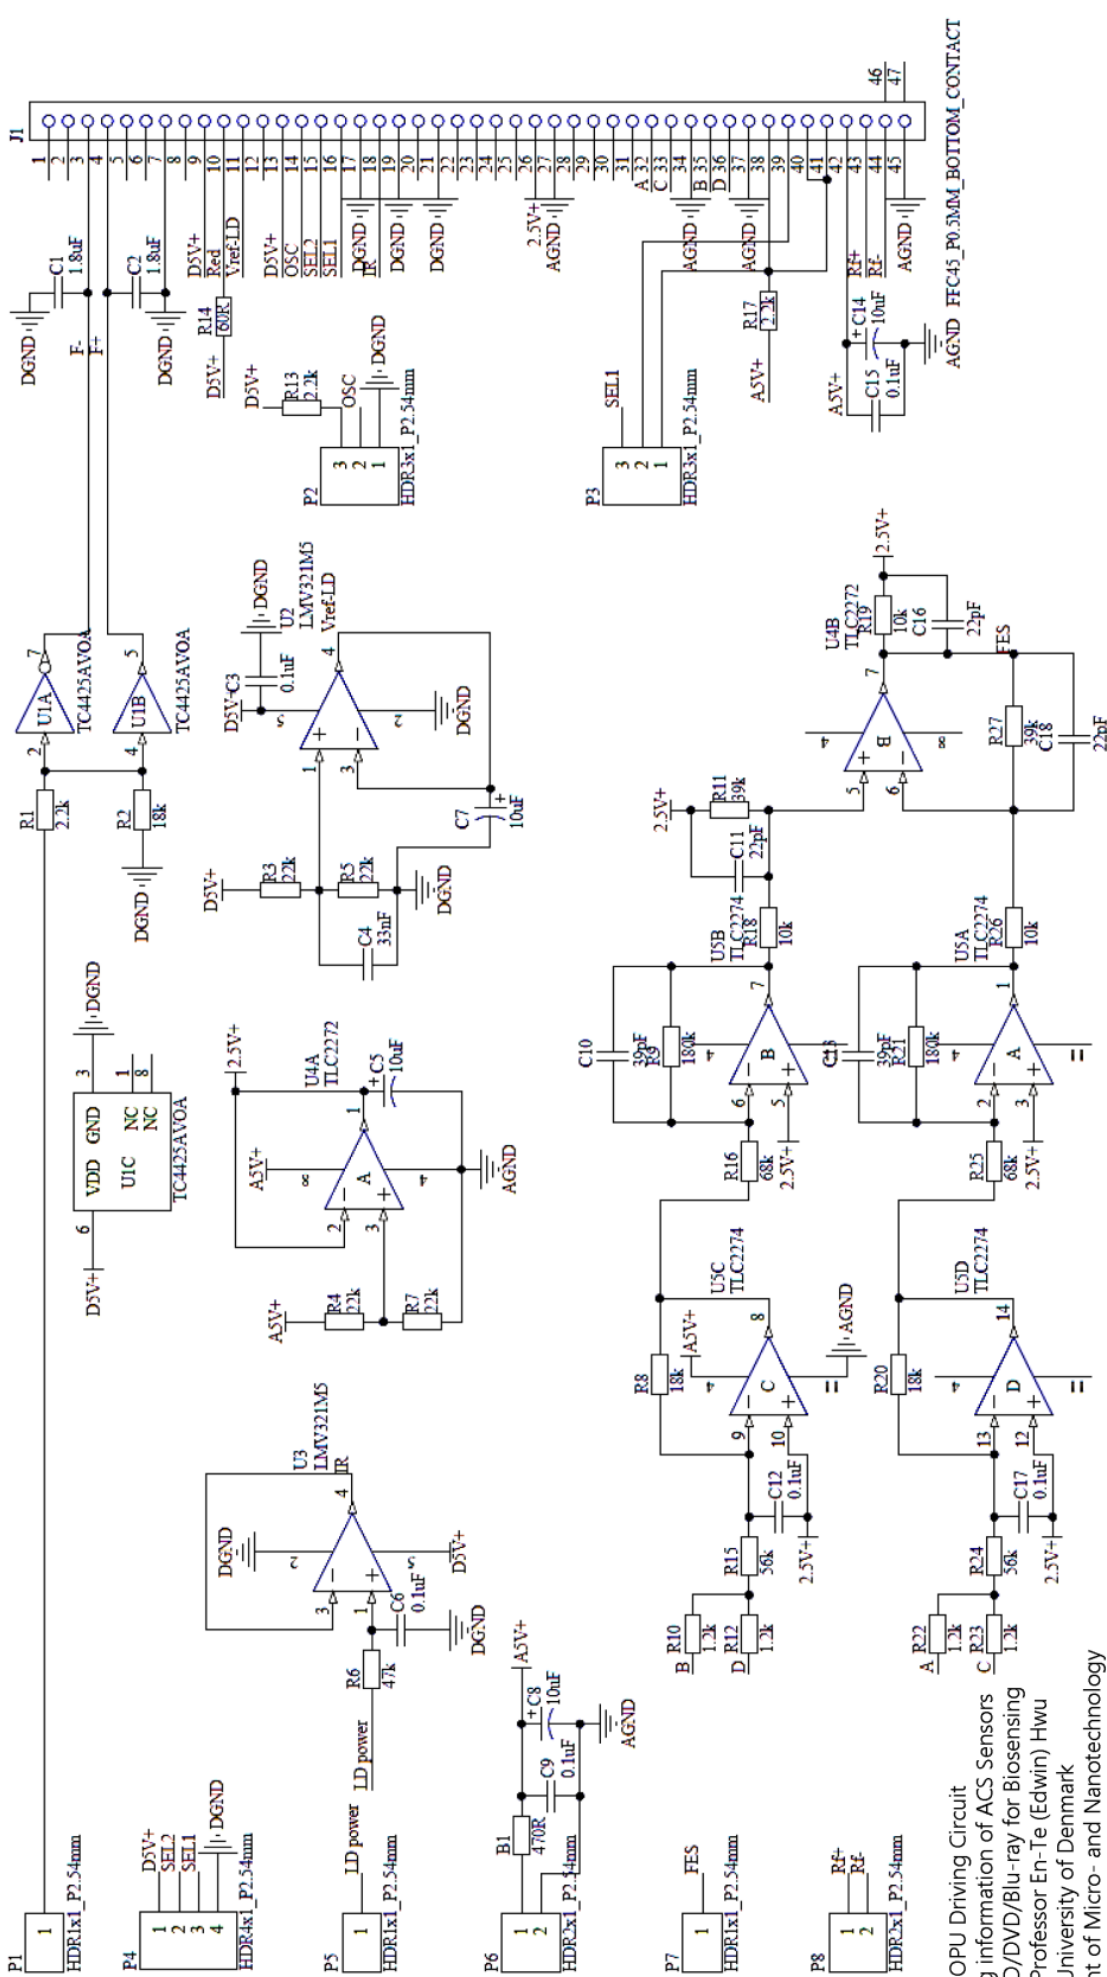

PHR-803T OPU Driving Circuit  
 Supporting information of ACS Sensors  
 Hacking CD/DVD/Blu-ray for Biosensing  
 Associate Professor En-Te (Edwin) Hwu  
 Technical University of Denmark  
 Department of Micro- and Nanotechnology  
 Address: Office 115, Ørstedes Plads, Building 345C, 2800 Kgs. Lyngby, Denmark  
 Email: whoand@gmail.com, etehw@nanotech.dtu.dk

Figure S-2. Customized controller circuit design for PHR-803T (Toshiba Co., Tokyo, Japan) with triple-wavelength OPU inside the XBOX 360 (Microsoft Co., Redmond, WA, USA).

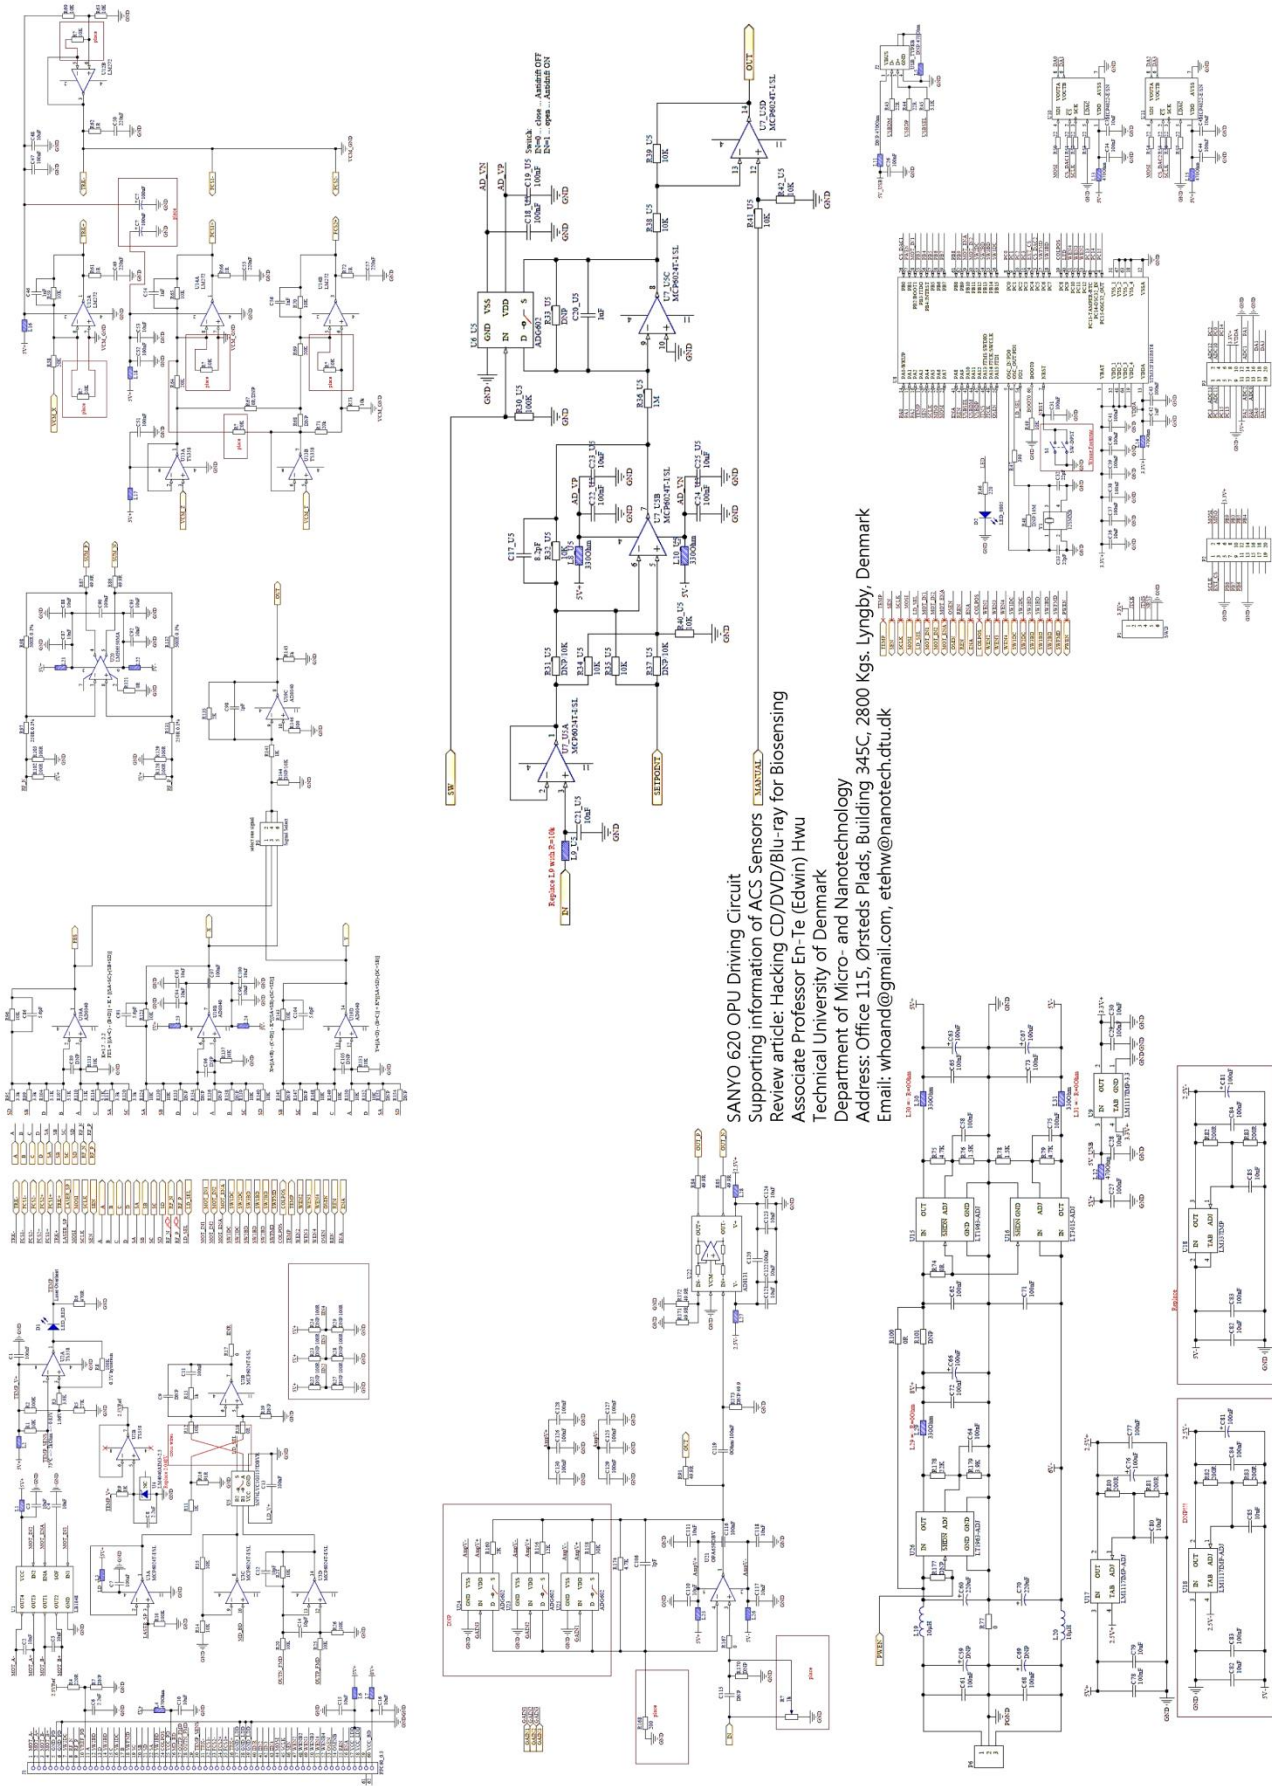

Figure S-3. Customized controller circuit design for SF-BC620L (Sanyo Electric Co., Ltd., Osaka, Japan) with triple-wavelength OPU.

SANYO 620 OPU Driving Circuit  
 Supporting information of ACS Sensors  
 Review article: Hacking CD/DVD/Blu-ray for Biosensing  
 Associate Professor En-Te (Edwin) Hwu  
 Technical University of Denmark  
 Department of Micro- and Nanotechnology  
 Address: Office 115, Ørstedss Plads, Building 345C, 2800 Kgs. Lyngby, Denmark  
 Email: whoand@gmail.com, etehw@nanotech.dtu.dk
